# Supplementary material
Source: publisher figshare collection journal article supplement (https://future-science-group.figshare.com/ndownloader/files/28250226)
Supplement: Supplementary file 1 [file 28250226]

Table 4: Main assignees of the 149 Collaboration patents between EU and CN sorted by country and by Entity (online only)

| **#** | **Country** | **# of  Fam.** | **# of Patents** |
| --- | --- | --- | --- |
| 1 | **France** | 8 | 68 |
| 2 | **United Kingdom** | 7 | 25 |
| 3 | **Swisse** | 4 | 41 |
| 4 | **Israel** | 3 | 6 |
| 5 | **Germany** | 2 | 17 |
| 6 | **Canada** | 2 | 14 |
| 7 | **Cyprus** | 1 | 14 |

| **#** | **Assignee (Companies and research insitututes)** | **# of  Fam.** | **# of Patents** | **Country** |
| --- | --- | --- | --- | --- |
| 1 | **IBM (CHINA)** | 7 | 25 | China |
| 2 | **IBM (GERMANY)** | 7 | 25 | Germany |
| 3 | **Bio merieux** | 3 | 23 | France |
| 4 | **Inserm** | 3 | 14 | France |
| 5 | **Pathway pharmaceuticals** | 3 | 6 | China |
| 6 | **Novartis** | 2 | 20 | Swisse |
| 7 | **BASF (CHINA)** | 2 | 17 | China |
| 8 | **BASF (Germany)** | 2 | 17 | Germany |
| 9 | **Institut Pasteur** | 1 | 12 | France |
| 10 | **C.N.R.S.** | 2 | 2 | France |
| 11 | **Hospices civils de Lyon** | 2 | 2 | France |
| 12 | **Shanghai Univ.** | 2 | 2 | China |
| 13 | **Xigen Inflammation** | 1 | 14 | Cyprus |
| 14 | **Arius Research** | 1 | 14 | Canada |
| 15 | **ROCHE** | 1 | 12 | Swisse |
| 16 | **Philip Morris** | 1 | 9 | Swisse |
| 17 | **Canada Cancer and Aging Lab.** | 1 | 2 | Canada |
